# Supplementary material
Source: PubMed Central journal article supplement (PMC4714356)
Supplement: NIHMS749440-supplement-supplement_1.pdf [file NIHMS749440-supplement-supplement_1.pdf]

## ACTIVITY SPACE DESTINATIONS

1

## Supplemental Tables

Table S1: Classification of destinations using North American Industry Classification System (NAICS) codes into 16 mutually exclusive categories.

| Destination Measure                  | NAICS Codes                                                                                                                                                                            |
|--------------------------------------|----------------------------------------------------------------------------------------------------------------------------------------------------------------------------------------|
| Ambulatory health care services      | 621111, 621112, 621210, 621310, 621320, 621330, 621340, 621391, 621399, 621493, 621498, 621999                                                                                         |
| Banks/credit unions                  | 522110, 522120, 522130                                                                                                                                                                 |
| Community center/neighborhood house  | 624120, 624190                                                                                                                                                                         |
| Convenience stores                   | 445120, 447110                                                                                                                                                                         |
| Entertainment                        | 512131, 711110, 711120, 711130, 711190                                                                                                                                                 |
| Food stores                          | 445110, 445210, 445220, 445230, 445299                                                                                                                                                 |
| Gyms and fitness centers             | 713940                                                                                                                                                                                 |
| Library                              | 519120                                                                                                                                                                                 |
| Malls                                | 531120                                                                                                                                                                                 |
| Museum                               | 712110                                                                                                                                                                                 |
| Nature/parks/botanical gardens       | 712130, 712190                                                                                                                                                                         |
| Pharmacies/drug stores/personal care | 446110, 446120, 446130, 446191, 446199                                                                                                                                                 |
| Religious organizations              | 813110                                                                                                                                                                                 |
| Restaurants                          | 722511, 722513, 722514, 722515                                                                                                                                                         |
| Retail shopping                      | 443142, 444130, 448110, 448120, 448130, 448140, 448150, 448190, 448210, 448310, 448320, 451110, 451120, 451130, 451140, 451211, 451212, 452111, 452112, 452990, 453210, 453220, 453310 |
| Services                             | 453110, 812111, 812112, 812113, 812310, 812320, 812921, 812922                                                                                                                         |
| Total                                | All 16 categories together                                                                                                                                                             |

## ACTIVITY SPACE DESTINATIONS

Table S2: Density (count/km<sup>2</sup>) and diversity of destinations<sup>a</sup> for two alternate types of activity spaces.

| Destination Measure                               | Standard Deviation<br>Ellipse <sup>b</sup><br>Median (IQR) | Minimum<br>Convex Polygon<br>Median (IQR) |
|---------------------------------------------------|------------------------------------------------------------|-------------------------------------------|
| Densities (count/km <sup>2</sup> )                |                                                            |                                           |
| Ambulatory health care services                   | 11.88 (20.39)                                              | 11.98 (16.93)                             |
| Banks/credit unions                               | 0.97 (1.41)                                                | 1.14 (1.42)                               |
| Community center/ neighborhood house              | 1.34 (2.11)                                                | 1.61 (2.85)                               |
| Convenience stores                                | 0.15 (0.24)                                                | 0.15 (0.23)                               |
| Entertainment                                     | 0.32 (0.93)                                                | 0.42 (0.92)                               |
| Food stores                                       | 3.05 (4.22)                                                | 3.02 (4.49)                               |
| Gyms and fitness centers                          | 0.84 (1.25)                                                | 1.08 (1.32)                               |
| Library                                           | 0.08 (0.24)                                                | 0.09 (0.23)                               |
| Malls                                             | 0.06 (0.33)                                                | 0.16 (0.41)                               |
| Museum                                            | 0.02 (0.25)                                                | 0.06 (0.35)                               |
| Nature/parks/botanical gardens                    | 0.01 (0.12)                                                | 0.02 (0.13)                               |
| Pharmacies/drug stores/personal care              | 2.81 (4.17)                                                | 3.19 (3.48)                               |
| Religious organizations                           | 1.49 (2.02)                                                | 1.58 (2.73)                               |
| Restaurants                                       | 11.17 (16.07)                                              | 12.08 (19.00)                             |
| Retail shopping                                   | 8.81 (17.10)                                               | 11.53 (19.79)                             |
| Services                                          | 5.82 (8.73)                                                | 6.48 (8.30)                               |
| Total                                             | 49.98 (88.28)                                              | 60.49 (79.37)                             |
| Diversity (number destination types) <sup>c</sup> | 13.74 (3.05)                                               | 14.53 (2.41)                              |

IQR = Interquartile Range

<sup>a</sup>Destinations classified using North American Industry Classification System (NAICS) codes

<sup>b</sup>One standard deviation ellipse

<sup>c</sup>Mean and standard deviation rather than median and IQR

## ACTIVITY SPACE DESTINATIONS

3

Table S3: Correlation between destination densities<sup>a</sup> and diversity in different types of neighborhoods.

|                                                   | Activity Spaces with Traditional Buffers <sup>b</sup> |              | All Mode Activity Spaces with Pedestrian and Bicycle Activity Spaces <sup>c</sup> | Traditional Buffers with each other <sup>d</sup> |
|---------------------------------------------------|-------------------------------------------------------|--------------|-----------------------------------------------------------------------------------|--------------------------------------------------|
|                                                   | 400-m buffer                                          | 800-m buffer |                                                                                   |                                                  |
| Densities (count/km <sup>2</sup> )                |                                                       |              |                                                                                   |                                                  |
| Ambulatory health care services                   | 0.38                                                  | 0.42         | 0.53                                                                              | 0.87                                             |
| Banks/credit unions                               | 0.18                                                  | 0.20         | 0.36                                                                              | 0.71                                             |
| Community center/ neighborhood house              | 0.44                                                  | 0.51         | 0.59                                                                              | 0.81                                             |
| Convenience stores                                | 0.26                                                  | 0.38         | 0.56                                                                              | 0.56                                             |
| Entertainment                                     | 0.26                                                  | 0.53         | 0.66                                                                              | 0.51                                             |
| Food stores                                       | 0.35                                                  | 0.47         | 0.49                                                                              | 0.69                                             |
| Gyms and fitness centers                          | 0.33                                                  | 0.61         | 0.66                                                                              | 0.66                                             |
| Library                                           | 0.36                                                  | 0.37         | 0.49                                                                              | 0.64                                             |
| Malls                                             | 0.31                                                  | 0.50         | 0.60                                                                              | 0.53                                             |
| Museum                                            | 0.36                                                  | 0.44         | 0.60                                                                              | 0.59                                             |
| Nature/parks/botanical gardens                    | 0.21                                                  | 0.37         | 0.66                                                                              | 0.74                                             |
| Pharmacies/drug stores/personal care              | 0.42                                                  | 0.43         | 0.55                                                                              | 0.75                                             |
| Religious organizations                           | 0.40                                                  | 0.50         | 0.54                                                                              | 0.76                                             |
| Restaurants                                       | 0.34                                                  | 0.49         | 0.58                                                                              | 0.75                                             |
| Retail shopping                                   | 0.28                                                  | 0.50         | 0.56                                                                              | 0.61                                             |
| Services                                          | 0.37                                                  | 0.44         | 0.52                                                                              | 0.81                                             |
| Total                                             | 0.40                                                  | 0.49         | 0.57                                                                              | 0.86                                             |
| Diversity (number destination types) <sup>e</sup> | 0.22                                                  | 0.18         | 0.28                                                                              | 0.85                                             |

<sup>a</sup>Destinations classified using North American Industry Classification System (NAICS) codes, densities expressed as counts/km<sup>2</sup>

<sup>b</sup>Correlation between all mode GPS-based activity space (Daily Path Area at 200 meters) and Euclidean residential buffers (400-m buffer; 800-m buffer)

<sup>c</sup>Correlation between all mode GPS-based activity spaces (Daily Path Area at 200 meters) and pedestrian and bicycling GPS-based activity space

<sup>d</sup>Correlation between 400-m and 800-m Euclidean residential buffers

<sup>e</sup>Pearson's instead of Spearman's correlation coefficients

## ACTIVITY SPACE DESTINATIONS

Table S4: Association between destinations<sup>a</sup> within neighborhoods and objectively measured physical activity for two alternate types of activity spaces.

| Destination Measure                                     | Standard Deviation<br>Ellipse <sup>b</sup><br>Mean difference or<br>OR (CL) | Minimum Convex<br>Polygon<br>Mean difference or<br>OR (CL) |
|---------------------------------------------------------|-----------------------------------------------------------------------------|------------------------------------------------------------|
| <b>Total Densities (10% difference)</b>                 |                                                                             |                                                            |
| Total physical activity (min/day) <sup>c</sup>          | -0.02 (-0.23, 0.18)                                                         | -0.01 (-0.22, 0.20)                                        |
| Daily step count                                        | 1.38 (-6.76, 9.51)                                                          | 1.94 (-6.26, 10.13)                                        |
| Meeting recommended daily steps                         | 1.01 (1.00, 1.03)                                                           | 1.02 (1.00, 1.04)                                          |
| <b>Diversity (1 additional number destination type)</b> |                                                                             |                                                            |
| Total physical activity (min/day) <sup>c</sup>          | -2.80 (-8.90, 3.29)                                                         | -1.12 (-8.80, 6.55)                                        |
| Daily step count                                        | -56.58 (-298.42,<br>185.26)                                                 | 23.80 (-279.45,<br>327.06)                                 |
| Meeting recommended daily steps                         | 0.94 (0.78, 1.17)                                                           | 1.00 (0.78, 1.39)                                          |

CL = 95% Confidence Limits

\* = p<0.1; \*\* = p<0.05

<sup>a</sup>Destinations classified using North American Industry Classification System (NAICS) codes

<sup>b</sup>One standard deviation ellipse

<sup>c</sup>ActiGraph accelerometry (GT3X+, 60s epoch); includes both light physical activity (100-1951 counts per minute) and moderate-to-vigorous physical activity ( $\geq 1952$  counts per minute) (Freedson, Melanson, & Sirard, 1998)

ACTIVITY SPACE DESTINATIONS

Table S5: Association between destination densities<sup>a</sup> within neighborhoods and total physical activity<sup>b</sup>.

| Destination Measure                  | Traditional Residential Buffers |                           | GPS-Defined Activity Spaces             |                        |                              |                                         |
|--------------------------------------|---------------------------------|---------------------------|-----------------------------------------|------------------------|------------------------------|-----------------------------------------|
|                                      | 400-m Buffer <sup>c</sup>       | 800-m Buffer <sup>c</sup> | Standard Deviation Ellipse <sup>d</sup> | Minimum Convex Polygon | Daily Path Area <sup>e</sup> | Daily Path Area (Ped/Bike) <sup>e</sup> |
|                                      | Mean difference (CL)            | Mean difference (CL)      | Mean difference (CL)                    | Mean difference (CL)   | Mean difference (CL)         | Mean difference (CL)                    |
| <b>Densities (10% difference)</b>    |                                 |                           |                                         |                        |                              |                                         |
| Ambulatory health care services      | 0.02 (-0.04, 0.07)              | 0.02 (-0.06, 0.09)        | -0.05 (-0.21, 0.11)                     | -0.02 (-0.24, 0.20)    | 0.06 (-0.83, 0.96)           | 0.05 (-0.05, 0.15)                      |
| Banks/credit unions                  | -0.01 (-0.07, 0.05)             | 0.02 (-0.04, 0.08)        | -0.05 (-0.16, 0.07)                     | 0.05 (-0.09, 0.20)     | 0.21 (-0.82, 1.24)           | 0.08 (0.01, 0.14)**                     |
| Community center/neighborhood house  | -0.01 (-0.07, 0.04)             | 0.01 (-0.06, 0.07)        | 0.00 (-0.15, 0.14)                      | 0.04 (-0.13, 0.21)     | -0.02 (-0.26, 0.21)          | 0.03 (-0.05, 0.11)                      |
| Convenience stores                   | 0.00 (-0.07, 0.07)              | 0.04 (-0.02, 0.10)        | -0.03 (-0.11, 0.04)                     | -0.02 (-0.11, 0.08)    | -0.02 (-0.10, 0.07)          | 0.06 (0.00, 0.12)*                      |
| Entertainment                        | -0.01 (-0.09, 0.07)             | 0.02 (-0.04, 0.07)        | -0.02 (-0.10, 0.07)                     | 0.00 (-0.11, 0.11)     | 0.04 (-0.10, 0.17)           | 0.05 (-0.01, 0.11)                      |
| Food stores                          | -0.02 (-0.08, 0.04)             | 0.08 (-0.01, 0.17)        | -0.06 (-0.20, 0.08)                     | 0.00 (-0.23, 0.23)     | 0.29 (-0.66, 1.24)           | 0.04 (-0.04, 0.12)                      |
| Gyms and fitness centers             | -0.02 (-0.08, 0.03)             | 0.01 (-0.06, 0.08)        | -0.06 (-0.18, 0.07)                     | -0.05 (-0.23, 0.12)    | -0.09 (-0.34, 0.15)          | 0.02 (-0.04, 0.09)                      |
| Library                              | 0.01 (-0.07, 0.08)              | 0.04 (-0.02, 0.10)        | 0.03 (-0.04, 0.10)                      | 0.04 (-0.05, 0.12)     | -0.02 (-0.12, 0.07)          | 0.06 (0.00, 0.12)**                     |
| Malls                                | -0.05 (-0.14, 0.05)             | 0.04 (-0.02, 0.10)        | -0.02 (-0.09, 0.04)                     | -0.02 (-0.09, 0.06)    | -0.02 (-0.10, 0.06)          | 0.01 (-0.05, 0.07)                      |
| Museum                               | -0.05 (-0.17, 0.06)             | -0.02 (-0.09, 0.06)       | -0.02 (-0.08, 0.05)                     | -0.02 (-0.08, 0.05)    | -0.03 (-0.10, 0.03)          | -0.02 (-0.09, 0.05)                     |
| Nature/parks/botanical gardens       | -0.03 (-0.12, 0.06)             | 0.01 (-0.07, 0.09)        | -0.03 (-0.10, 0.03)                     | -0.03 (-0.10, 0.04)    | -0.06 (-0.12, 0.00)*         | -0.04 (-0.12, 0.03)                     |
| Pharmacies/drug stores/personal care | -0.04 (-0.09, 0.02)             | 0.02 (-0.04, 0.09)        | -0.06 (-0.20, 0.08)                     | -0.01 (-0.23, 0.22)    | 0.14 (-0.84, 1.11)           | 0.02 (-0.07, 0.10)                      |
| Religious organizations              | 0.04 (-0.02, 0.10)              | 0.00 (-0.09, 0.10)        | -0.02 (-0.13, 0.08)                     | 0.05 (-0.10, 0.19)     | 0.30 (-0.89, 1.50)           | -0.01 (-0.08, 0.07)                     |
| Restaurants                          | 0.00 (-0.06, 0.06)              | 0.08 (-0.01, 0.18)        | -0.05 (-0.21, 0.11)                     | 0.01 (-0.21, 0.22)     | 0.16 (-0.68, 0.99)           | 0.06 (-0.04, 0.16)                      |
| Retail shopping                      | 0.00 (-0.06, 0.06)              | 0.00 (-0.12, 0.11)        | -0.06 (-0.22, 0.10)                     | -0.01 (-0.23, 0.21)    | -0.03 (-0.79, 0.73)          | 0.01 (-0.08, 0.11)                      |
| Services                             | -0.01 (-0.08, 0.05)             | 0.11 (0.01, 0.21)**       | -0.06 (-0.23, 0.10)                     | -0.01 (-0.23, 0.22)    | 0.10 (-0.85, 1.05)           | 0.03 (-0.08, 0.14)                      |

CL = 95% Confidence Limits

\* = p<0.1; \*\* = p<0.05

<sup>a</sup>Destinations classified using North American Industry Classification System (NAICS) codes. Estimates are for a 10% difference.

<sup>b</sup>ActiGraph accelerometry (GT3X+, 60s epoch); includes both light physical activity (100-1951 counts per minute) and moderate-to-vigorous physical activity (≥1952 counts per minute) (Freedson et al., 1998)

<sup>c</sup>Euclidean residential buffers

<sup>d</sup>One standard deviation ellipse

<sup>e</sup>Trip-based lines buffered 200 meters

## ACTIVITY SPACE DESTINATIONS

Table S6: Association between destination densities<sup>a</sup> within neighborhoods and daily steps.

| Destination Measure                  | Traditional Residential Buffers |                           | GPS-Defined Activity Spaces             |                        |                              |                                         |
|--------------------------------------|---------------------------------|---------------------------|-----------------------------------------|------------------------|------------------------------|-----------------------------------------|
|                                      | 400-m Buffer <sup>b</sup>       | 800-m Buffer <sup>b</sup> | Standard Deviation Ellipse <sup>c</sup> | Minimum Convex Polygon | Daily Path Area <sup>d</sup> | Daily Path Area (Ped/Bike) <sup>d</sup> |
|                                      | Mean difference (CL)            | Mean difference (CL)      | Mean difference (CL)                    | Mean difference (CL)   | Mean difference (CL)         | Mean difference (CL)                    |
| Ambulatory health care services      | 1.19 (-1.10, 3.49)              | 1.21 (-1.81, 4.24)        | 0.18 (-6.13, 6.49)                      | 2.05 (-6.57, 10.68)    | 26.43 (-8.35, 61.22)         | 3.72 (-0.35, 7.80)*                     |
| Banks/credit unions                  | 0.06 (-2.23, 2.34)              | 0.81 (-1.57, 3.19)        | 0.53 (-4.13, 5.19)                      | 1.41 (-4.34, 7.17)     | 37.16 (-2.66, 76.99)*        | 3.10 (0.44, 5.75)**                     |
| Community center/ neighborhood house | -0.06 (-2.29, 2.16)             | 0.12 (-2.45, 2.69)        | -0.44 (-6.11, 5.24)                     | 1.59 (-5.20, 8.37)     | 1.50 (-7.70, 10.71)          | 1.98 (-1.19, 5.15)                      |
| Convenience stores                   | 0.79 (-2.05, 3.64)              | 2.20 (-0.09, 4.49)*       | -0.61 (-3.60, 2.38)                     | 0.91 (-2.84, 4.66)     | 0.50 (-2.87, 3.87)           | 3.26 (0.79, 5.74)**                     |
| Entertainment                        | 0.68 (-2.47, 3.83)              | 0.78 (-1.56, 3.13)        | 1.32 (-2.01, 4.64)                      | 0.95 (-3.26, 5.17)     | 1.68 (-3.59, 6.96)           | 2.10 (-0.44, 4.64)                      |
| Food stores                          | -0.20 (-2.52, 2.12)             | 3.28 (-0.41, 6.98)*       | -1.69 (-7.26, 3.87)                     | 1.97 (-7.04, 10.97)    | 24.89 (-12.18, 61.96)        | 2.14 (-1.20, 5.49)                      |
| Gyms and fitness centers             | 0.56 (-1.60, 2.71)              | 1.37 (-1.29, 4.03)        | -1.67 (-6.75, 3.41)                     | -0.02 (-7.01, 6.98)    | -0.24 (-9.99, 9.51)          | 2.51 (-0.15, 5.16)*                     |
| Library                              | 1.23 (-1.59, 4.06)              | 1.56 (-0.81, 3.92)        | 1.54 (-1.33, 4.41)                      | 0.39 (-3.09, 3.86)     | -1.25 (-4.99, 2.50)          | 2.25 (-0.25, 4.76)*                     |
| Malls                                | -1.40 (-5.22, 2.42)             | 2.35 (-0.09, 4.78)*       | -0.15 (-2.75, 2.45)                     | 1.27 (-1.70, 4.25)     | 1.50 (-1.74, 4.74)           | 0.99 (-1.53, 3.51)                      |
| Museum                               | -1.37 (-5.83, 3.09)             | -1.12 (-4.09, 1.86)       | -0.70 (-3.17, 1.76)                     | -0.24 (-2.92, 2.45)    | 0.00 (-2.58, 2.57)           | 1.45 (-1.48, 4.38)                      |
| Nature/parks/botanical gardens       | -1.33 (-4.85, 2.20)             | -0.28 (-3.31, 2.75)       | -0.76 (-3.45, 1.93)                     | 0.09 (-2.61, 2.78)     | -1.01 (-3.41, 1.39)          | 0.02 (-3.19, 3.23)                      |
| Pharmacies/drug stores/personal care | 0.13 (-1.98, 2.25)              | 1.28 (-1.32, 3.88)        | -1.25 (-6.83, 4.32)                     | 2.27 (-6.71, 11.26)    | 27.94 (-10.01, 65.90)        | 1.76 (-1.71, 5.23)                      |
| Religious organizations              | 0.39 (-1.98, 2.75)              | -1.33 (-5.23, 2.56)       | -1.59 (-5.83, 2.64)                     | 0.52 (-5.09, 6.13)     | 9.29 (-38.07, 56.64)         | -0.78 (-4.02, 2.45)                     |
| Restaurants                          | 0.74 (-1.63, 3.12)              | 3.53 (-0.18, 7.24)*       | -0.28 (-6.57, 6.01)                     | 2.36 (-6.15, 10.87)    | 22.21 (-10.47, 54.89)        | 3.19 (-0.85, 7.24)                      |
| Retail shopping                      | 0.01 (-2.45, 2.47)              | -1.57 (-6.10, 2.96)       | -0.34 (-6.66, 5.98)                     | 2.21 (-6.33, 10.75)    | 18.47 (-11.17, 48.11)        | 0.76 (-3.16, 4.67)                      |
| Services                             | 1.09 (-1.43, 3.61)              | 4.72 (0.78, 8.66)**       | -0.40 (-6.90, 6.10)                     | 1.97 (-6.87, 10.82)    | 25.32 (-11.72, 62.36)        | 2.41 (-2.04, 6.86)                      |

CL = 95% Confidence Limits

\* = p&lt;0.1; \*\* = p&lt;0.05

<sup>a</sup>Destinations classified using North American Industry Classification System (NAICS) codes. Estimates are for a 10% difference.<sup>b</sup>Euclidean residential buffers<sup>c</sup>One standard deviation ellipse<sup>d</sup>Trip-based lines buffered 200 meters

## ACTIVITY SPACE DESTINATIONS

7

1  
2  
3  
4  
5  
6 Freedson, P. S., Melanson, E., & Sirard, J. (1998). Calibration of the Computer Science and  
7 Applications, Inc. accelerometer. *Medicine and Science in Sports and Exercise*, 30(5),  
8 777-781.  
9  
10  
11  
12  
13  
14  
15  
16  
17  
18  
19  
20  
21  
22  
23  
24  
25  
26  
27  
28  
29  
30  
31  
32  
33  
34  
35  
36  
37  
38  
39  
40  
41  
42  
43  
44  
45  
46  
47  
48  
49  
50  
51  
52  
53  
54  
55  
56  
57  
58  
59  
60

For Peer Review
